# Supplementary material for: Measurement and modeling of the multi-wavelength optical properties ofuncoated flame-generated soot
Source: Copernicus journal article supplement (doi:10.5194/acp-2018-306), 2018-04-11
Supplement: Supplementary file 1 [file acp-2018-306-supplement.pdf]

## **Supplementary Material for “Measurement and modeling of the multi-wavelength optical properties of uncoated flame-generated soot”**

Sara D. Forestieri,<sup>1, #</sup> Taylor M. Helgestad<sup>1, #</sup> Andrew Lambe,<sup>2, 3</sup> Lindsay Renbaum-Wolff<sup>2</sup>, Daniel A. Lack,<sup>4, 5, ^</sup> Paola Massoli,<sup>2</sup> Eben S. Cross,<sup>6, &</sup> Manvendra K. Dubey,<sup>7</sup> Claudio Mazzoleni,<sup>8</sup> Jason Olfert,<sup>9</sup> Andrew Freedman,<sup>2</sup> Paul Davidovits,<sup>3</sup> Timothy B. Onasch,<sup>2, 3</sup> Christopher D. Cappa<sup>1</sup>

<sup>1</sup>Department of Civil and Environmental Engineering, University of California, Davis, CA 95616

<sup>2</sup>Aerodyne Research Inc., Billerica, Massachusetts, USA, 01821

<sup>3</sup>Chemistry Department, Boston College, Boston, MA, USA, 02467

<sup>4</sup>NOAA Earth System Research Laboratory, Boulder, CO, USA, 80305

<sup>5</sup>University of Colorado, Cooperative Institute for Research of the Environmental Sciences, Boulder, CO, USA, 80305

<sup>6</sup>Department of Civil and Environmental Engineering, Massachusetts Institute of Technology, Cambridge, Massachusetts, USA

<sup>7</sup>Los Alamos National Laboratory, Los Alamos, NM, USA

<sup>8</sup>Department of Physics and Atmospheric Sciences Program, Michigan Technological University, Houghton, MI, USA

<sup>9</sup>Department of Mechanical Engineering, University of Alberta, Edmonton, Alberta, Canada

<sup>#</sup> Now at: California Air Resources Board, Sacramento, CA, USA

<sup>^</sup> Now at: Transport Emissions, Air Quality and Climate Consulting, Brisbane, Australia

<sup>&</sup> Now at: Aerodyne Research Inc., Billerica, Massachusetts, USA, 01821

Correspondence to: Sara Forestieri ([sara.forestieri@arb.ca.gov](mailto:sara.forestieri@arb.ca.gov)) or Christopher Cappa ([cdcappa@ucdavis.edu](mailto:cdcappa@ucdavis.edu))

The supplementary material consists of five tables and ten figures.

**Table S1.** Summary of terminology

| Terminology                | Definition                                                                                                                                                         |
|----------------------------|--------------------------------------------------------------------------------------------------------------------------------------------------------------------|
| Nascent soot               | Soot particles that were not subject to additional thermal or chemical processing                                                                                  |
| Nascent-denuded soot       | Soot particles that were heated to 270 °C for ~5 seconds in a thermal denuder                                                                                      |
| Coated-denuded soot        | Soot particles that were first coated with either DOS, H <sub>2</sub> SO <sub>4</sub> or SOA and subsequently heated to 270 °C for ~5 seconds in a thermal denuder |
| Forward-coating experiment | Experiments in which the particles were size selected, then the monodisperse particles were coated, and finally thermally denuded                                  |
| Reverse-coating experiment | Experiments in which the polydisperse particle distribution was first coated, then the particles were size selected, and finally thermally denuded                 |

**Table S2.** Summary of instrumentation used in BC2, BC3, BC3+, and BC4.

| <b>Instrument</b>                                                                          | <b>Manufacturer</b>              | <b>Measurement</b>                                                                                                                                     | <b>Study</b>       |
|--------------------------------------------------------------------------------------------|----------------------------------|--------------------------------------------------------------------------------------------------------------------------------------------------------|--------------------|
| Centrifugal particle mass analyzer (CPMA)                                                  | Cambustion                       | Per particle mass in fg particle <sup>-1</sup>                                                                                                         | All Studies        |
| Scanning mobility particle sizer (SMPS)                                                    | TSI                              | Particle mobility size distributions                                                                                                                   | All Studies        |
| Condensation particle counter (CPC)                                                        | TSI                              | Number concentration of particles in particles cm <sup>-3</sup>                                                                                        | All Studies        |
| 3 wavelength photoacoustic soot spectrometer (PASS-3) equipped with scattering sensor      | Droplet Measurement Technologies | Aerosol absorption and extinction coefficients ( $b_{\text{abs}}$ and $b_{\text{ext}}$ ) at $\lambda = 405$ nm, 532 nm, and 781 nm in Mm <sup>-1</sup> | BC2                |
| NOAA photoacoustic spectrometer (PAS)                                                      | Custom-built                     | $b_{\text{ext}}$ at $\lambda = 532$ nm in Mm <sup>-1</sup>                                                                                             | BC2                |
| NOAA cavity ringdown spectrometer (CRD)                                                    | Custom-built                     | $b_{\text{abs}}$ at $\lambda = 532$ nm in Mm <sup>-1</sup>                                                                                             | BC2                |
| UC Davis CRD-PAS                                                                           | Custom-built                     | $b_{\text{abs}}$ and $b_{\text{ext}}$ in Mm <sup>-1</sup> at $\lambda = 405$ nm and 532 nm                                                             | BC3, BC3+, and BC4 |
| Cavity attenuated phase shift single scatter albedo spectrometer (CAPS PM <sub>SSA</sub> ) | Aerodyne Research                | Scattering and absorption coefficients ( $b_{\text{sca}}$ and $b_{\text{ext}}$ ) in Mm <sup>-1</sup> at $\lambda = 630$ nm                             | BC3, BC3+, and BC4 |
| Soot particle aerosol mass spectrometer (SP-AMS)                                           | Aerodyne Research                | Chemical and physical properties of black carbon                                                                                                       | BC2, BC3, and BC4  |
| Compact time-of-flight aerosol mass spectrometer (c-ToF-AMS)                               | Aerodyne Research                | Chemical composition of non-refractory aerosol                                                                                                         | BC3                |

**Table S3.** Observed mean *MACs* for the methane flame, averaged across BC3, BC3+ and BC4. Uncertainties are reported as 1 $\sigma$  standard deviations over the measurements

| $\lambda$ (nm) | <i>MAC</i> (m <sup>2</sup> g <sup>-1</sup> )<br>(all points) | <i>AAE</i>        | <i>MAC</i> (m <sup>2</sup> g <sup>-1</sup> )<br>( $x > 0.9$ ) | <i>AAE</i> | <i>MAC</i> (m <sup>2</sup> g <sup>-1</sup> )<br>( $x < 0.9$ ) | <i>AAE</i> |
|----------------|--------------------------------------------------------------|-------------------|---------------------------------------------------------------|------------|---------------------------------------------------------------|------------|
| 405            | 11.8 $\pm$ 1.7                                               | 1.16*             | 12.1 $\pm$ 1.4                                                | 1.04       | 11.1 $\pm$ 2.0                                                | 1.20       |
| 532            | 8.6 $\pm$ 1.3                                                | 1.42 <sup>#</sup> | 9.1 $\pm$ 1.1                                                 | 1.21       | 8.0 $\pm$ 1.4                                                 | 1.35       |
| 630            | 6.3 $\pm$ 1.2                                                | 1.84 <sup>+</sup> | 7.1 $\pm$ 1.1                                                 | 1.47       | 6.1 $\pm$ 1.2                                                 | 1.60       |

\* 405-532 nm; <sup>#</sup> 405-630 nm; <sup>+</sup> 532-630 nm

**Table S4.** Minimum and maximum binned *MACs* for all flame types.

| $\lambda$ (nm)                                       | Instrument             | Smallest $x$ bin |               |                                         | Largest $x$ bin |               |                                         |
|------------------------------------------------------|------------------------|------------------|---------------|-----------------------------------------|-----------------|---------------|-----------------------------------------|
|                                                      |                        | Size parameter   | # Data Points | $MAC$ (m <sup>2</sup> g <sup>-1</sup> ) | Size parameter  | # Data Points | $MAC$ (m <sup>2</sup> g <sup>-1</sup> ) |
| <i>Methane Diffusion Flame (BC3, BC3+ &amp; BC4)</i> |                        |                  |               |                                         |                 |               |                                         |
| 405                                                  | UCD CRD-PAS            | 0.54             | 13            | $9.7 \pm 3.2$                           | 1.62            | 10            | $11.2 \pm 1.0$                          |
| 532                                                  | UCD CRD-PAS            | 0.36             | 5             | $5.4 \pm 0.8$                           | 1.26            | 11            | $8.7 \pm 1.0$                           |
| 630                                                  | CAPS PM <sub>SSA</sub> | 0.36             | 14            | $4.4 \pm 0.8$                           | 1.08            | 8             | $7 \pm 0.67$                            |
| <i>Ethylene Premixed Flame Denuded (BC2)</i>         |                        |                  |               |                                         |                 |               |                                         |
| 405                                                  | PASS-3                 | 0.72             | 7             | $10.8 \pm 1.5$                          | 1.08            | 5             | $11.5 \pm 1.3$                          |
| 532                                                  | PASS-3                 | 0.36             | 5             | $4.5 \pm 2.1$                           | 0.9             | 6             | $9.0 \pm 0.7$                           |
| 532                                                  | PASS-3                 | 0.54             | 8             | $6.9 \pm 1.0$                           | 0.9             | 6             | $7.6 \pm 0.9$                           |
| 781                                                  | PASS-3                 | 0.36             | 9             | $3.7 \pm 0.6$                           | 0.54            | 20            | $3.7 \pm 0.6$                           |
| <i>Ethylene Premixed Flame Nascent (BC2)</i>         |                        |                  |               |                                         |                 |               |                                         |
| 405                                                  | PASS-3                 | 0.36             | 6             | $5.6 \pm 1.9$                           | 1.08            | 7             | $10.54 \pm 2.2$                         |
| 532                                                  | NOAA CRD-PAS           | 0.36             | 5             | $4.1 \pm 0.9$                           | 0.9             | 6             | $6.9 \pm 1.5$                           |
| 532                                                  | PASS-3                 | 0.54             | 6             | $5.5 \pm 1.0$                           | 0.9             | 6             | $6.4 \pm 1.2$                           |
| 781                                                  | PASS-3                 | 0.36             | 9             | $2.3 \pm 0.5$                           | 0.54            | 14            | $2.8 \pm 0.5$                           |

**Table S5.** Observed mean *MACs* from the BC3+ ethylene flame.

| $\lambda$ (nm) | <i>MAC</i> (m <sup>2</sup> g <sup>-1</sup> ) | <i>MAC</i> (m <sup>2</sup> g <sup>-1</sup> ) | <i>MAC</i> (m <sup>2</sup> g <sup>-1</sup> ) |
|----------------|----------------------------------------------|----------------------------------------------|----------------------------------------------|
|                | $d_{p,VED}$ 50-70 nm                         | $d_{p,VED}$ 70-130 nm                        | $d_{p,VED}$ > 130 nm                         |
| 405            | 8.2 $\pm$ 2.6                                | 9.5 $\pm$ 1.9                                | 9.9 $\pm$ 1.7                                |
| 532            | 4.8 $\pm$ 0.80                               | 6.2 $\pm$ 1.0                                | 5.7 $\pm$ 0.90                               |
| 630            | 2.9 $\pm$ 0.90                               | 3.7 $\pm$ 0.5                                | 4.0 $\pm$ 0.7                                |

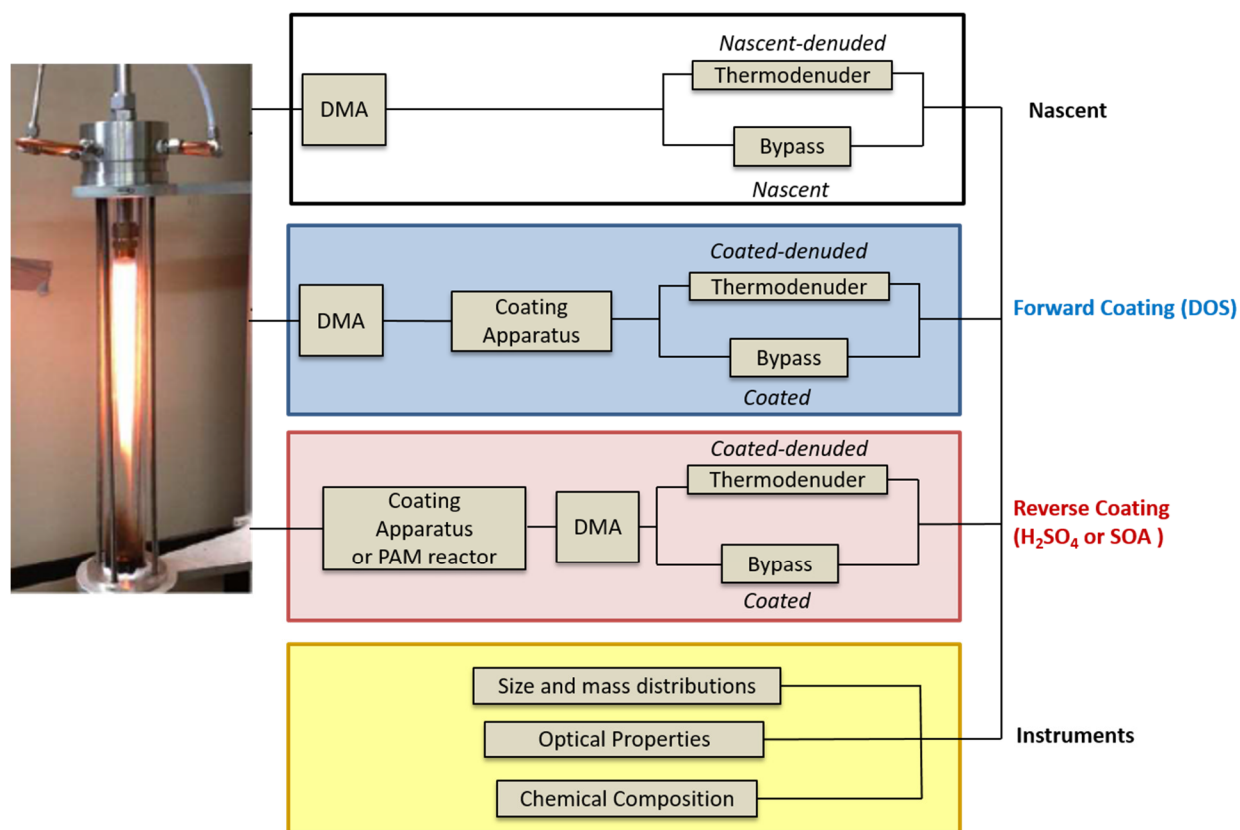

**Figure S1.** General experimental set-up for BC2, BC3, BC3+, and BC4, for the methane diffusion flame. Note that during BC4, particles were mass-selected with a CPMA, in addition to being size-selected.

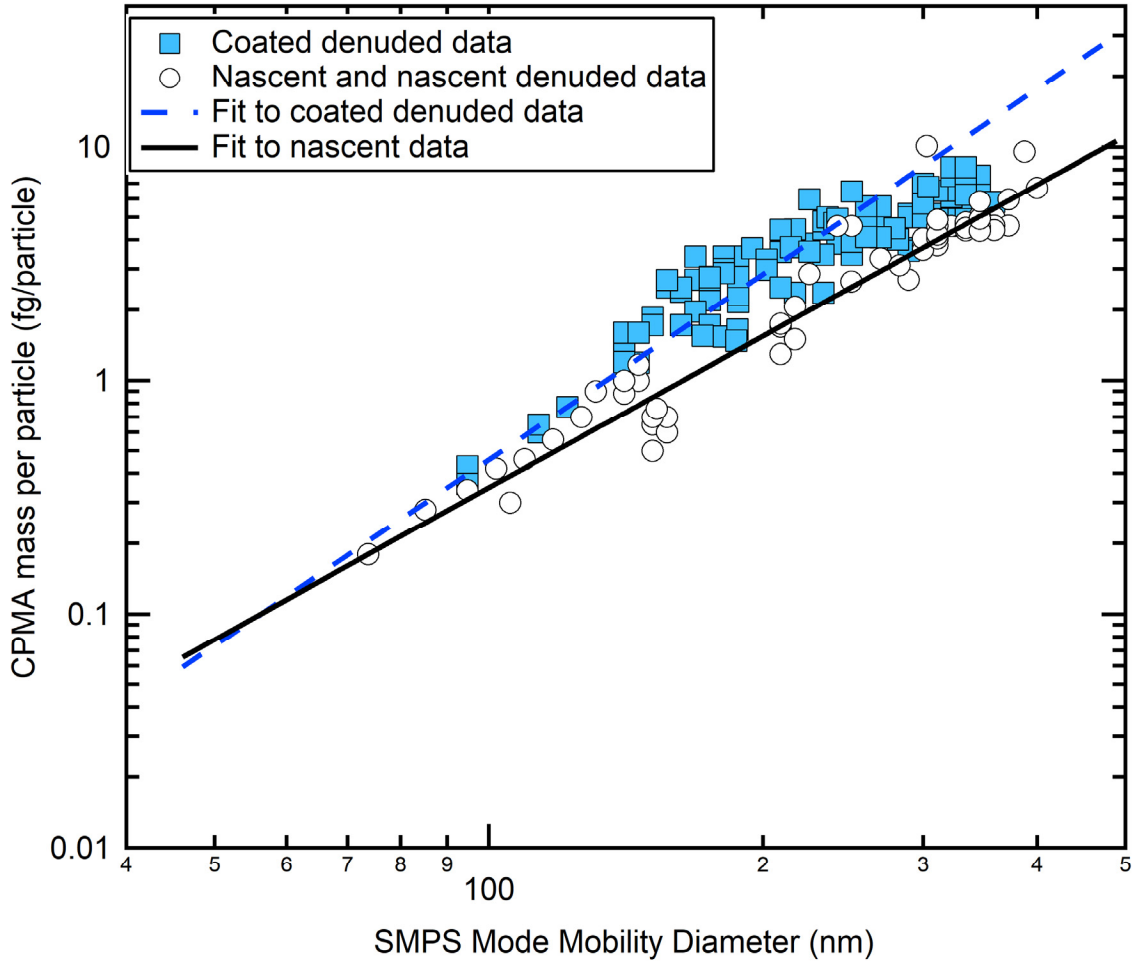

**Figure S2.** Observations and fits of CPMA mass per particle as a function of the SMPS mode number-weighted mobility diameter for methane diffusion flame soot particles. The blue squares show coated denuded observations and the dashed blue line is the power law fit to the coated-denuded data. The white circles are nascent observations and the black line is the power law fit to the nascent observations. Note that the fits to the coated-denuded data are for particles with mobility diameter  $< 260$  nm since the large particles generally have thinner coatings and are therefore more fractal-like. The data were fit to a power law function (see eqn. 8 in the main text). For nascent soot, fit parameters  $C$  and  $D_{f,m}$  were  $1.70 \times 10^{-5}$  and 2.12, respectively, and for coated-denuded soot, fit parameters  $C$  and  $D_{f,m}$  were  $2.44 \times 10^{-6}$  and 2.64, respectively.

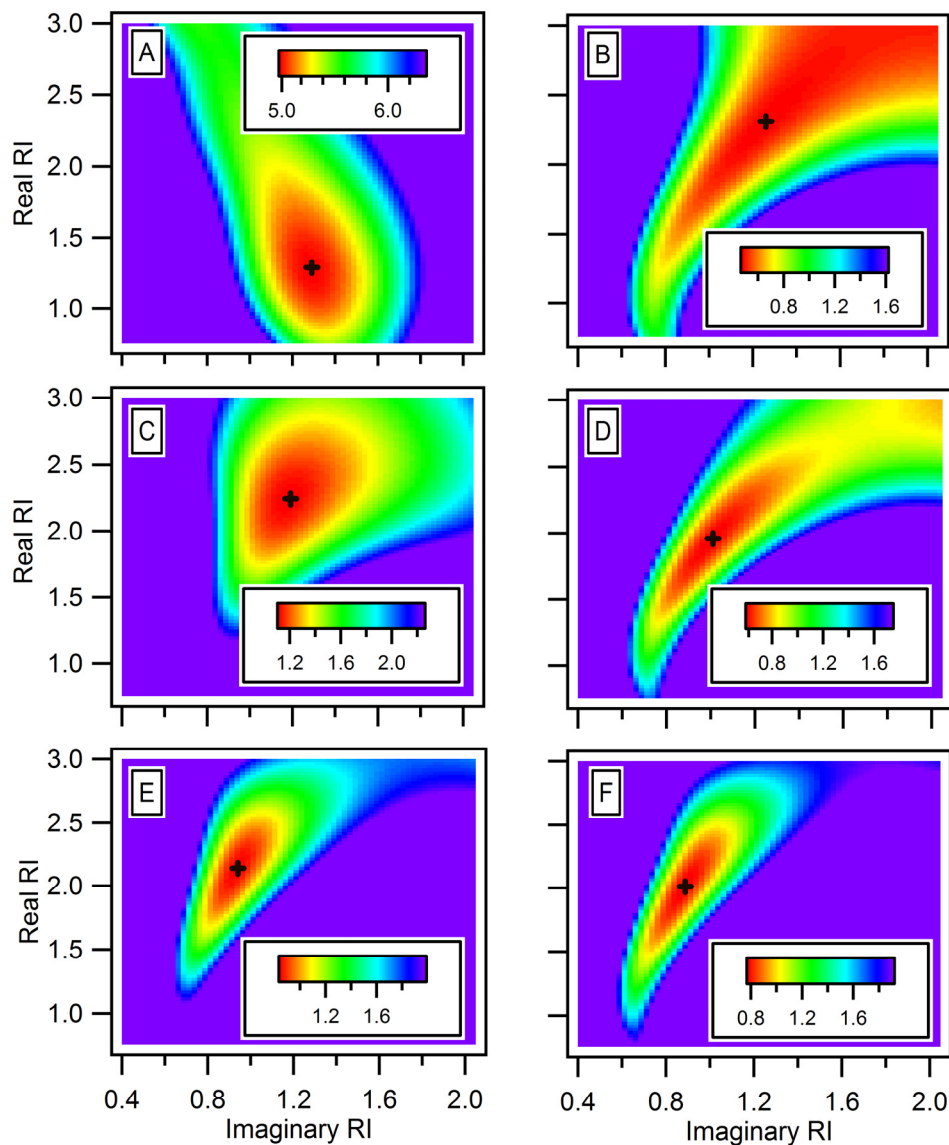

**Figure S3.** Image plots of the reduced  $\chi^2$  values of Mie Theory fits to absorption for all methane flame data. The colors represent the reduced  $\chi^2$  value at each effective refractive index. Each panel differentiates between different wavelengths. The column on the left is the fit over all size parameters and the column on the right corresponds to size parameter  $(x) < 0.9$ . The minimum reduced  $\chi^2$  are shown as black crosses. Panels A and B correspond to  $\lambda = 405$  nm data, panels C and D correspond to  $\lambda = 532$  nm data, and panels E and F correspond to  $\lambda = 630$  nm data. Purple on the image plots indicates the region beyond 1 standard deviation of the reduced  $\chi^2$  value ( $\chi^2 + 1.11$ ).

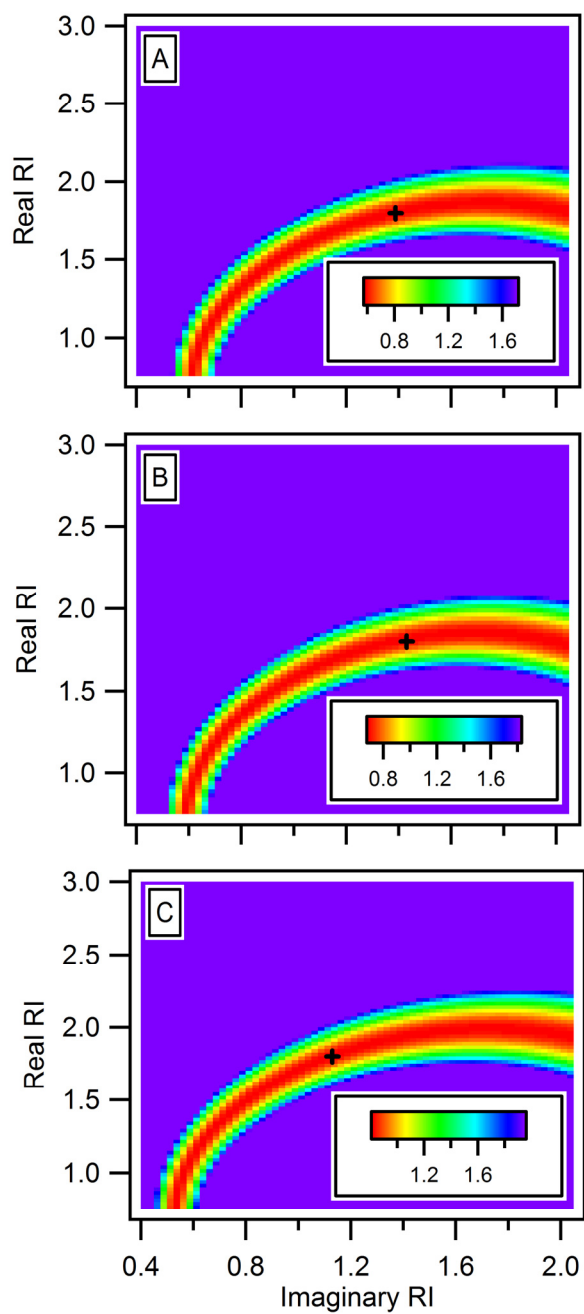

**Figure S4.** Same as Figure S3, except for RDG fits instead of Mie fits over all size parameters. Panel A, B, and C correspond to  $\lambda = 405$  nm, 532 nm, and 630 nm data, respectively.



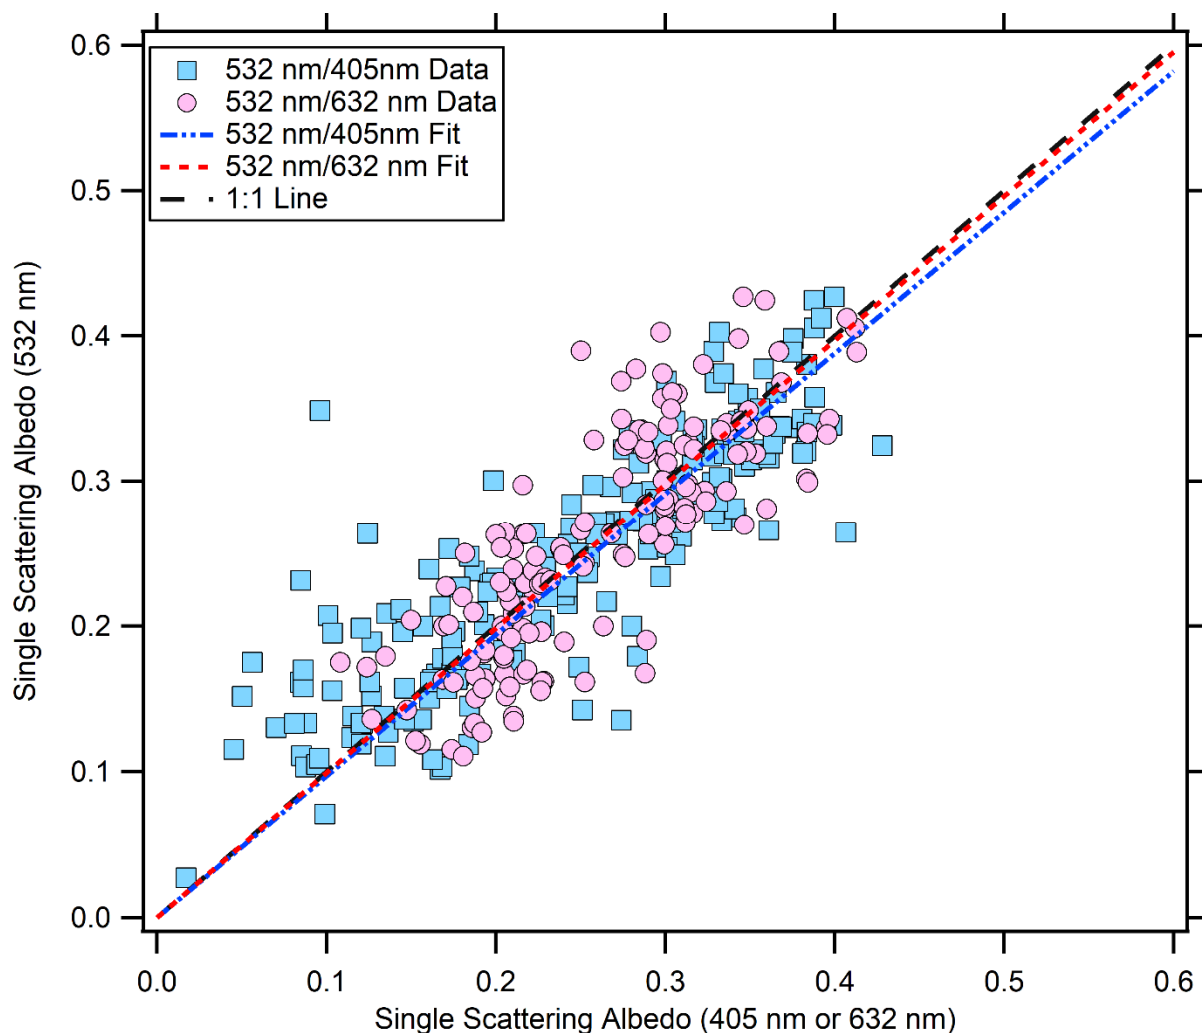

**Figure S5.** Comparison between observations of the single scattering albedo (*SSA*) at  $\lambda = 532$  nm and at  $\lambda = 405$  nm (blue squares) or at  $\lambda = 630$  nm (pink circles) for the methane diffusion flame. The blue dashed line is a linear fit to the  $\lambda = 405$  nm and 532 nm *SSA* pair, the red dashed line is the fit to the  $\lambda = 630$  nm and 532 nm *SSA* pair. The black line is the 1:1 line. Note the generally good agreement between the *SSAs* between wavelengths. The best-fit slope was 0.97 for the  $\lambda = 405$  nm/532 nm pair and 0.99 for the  $\lambda = 630$  nm/532 nm pair.

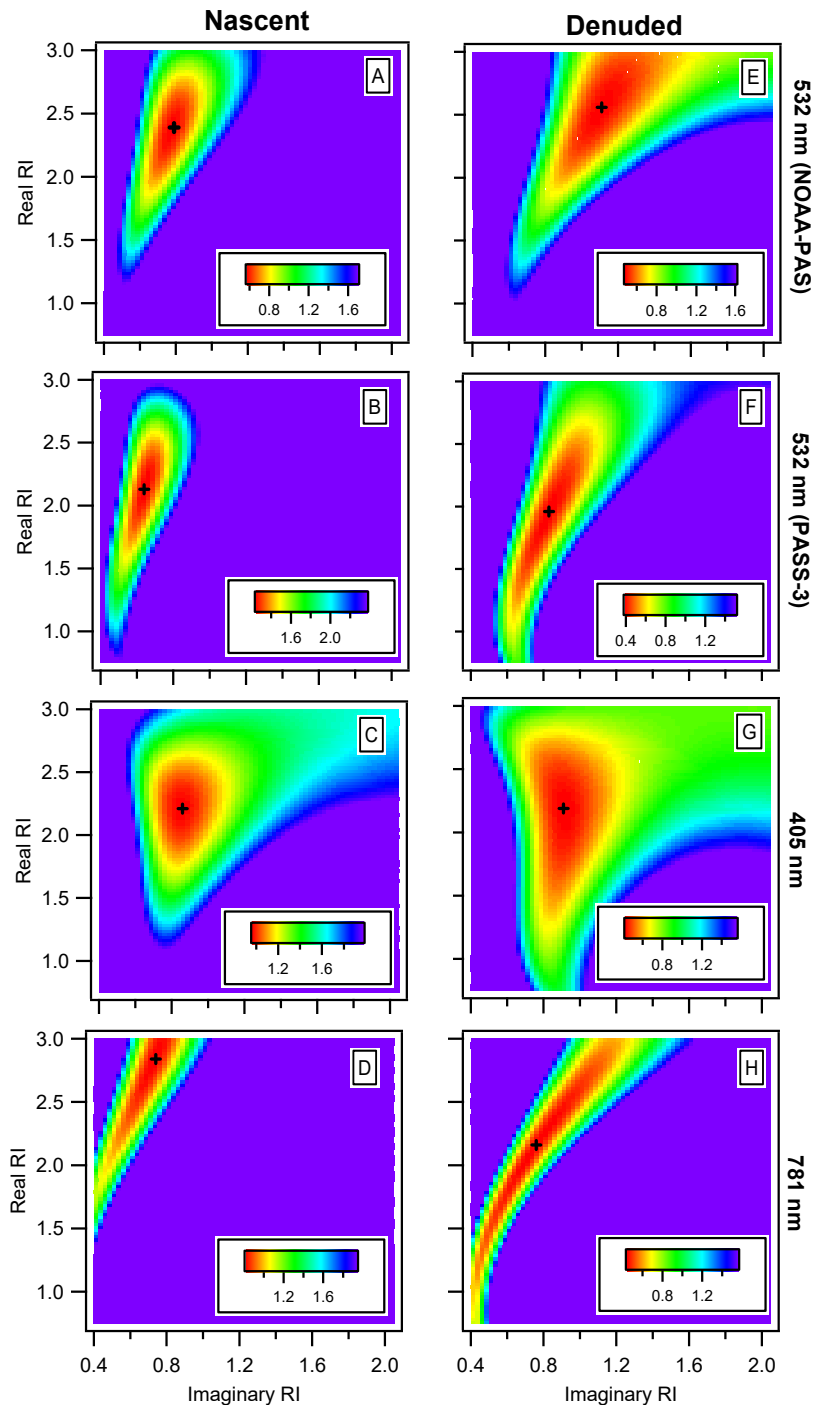

**Figure S6.** Image plots of the reduced  $\chi^2$  values of Mie Theory fits to absorption for all ethylene flame (20 cm sampling height) data from BC2. Colors indicate reduced  $\chi^2$  values, with the minima values shown as black crosses. Purple indicates the region beyond  $1\sigma$  of the minimum reduced  $\chi^2$  value ( $\chi^2+1.11$ ). Each panel is for a particular wavelength and soot type (nascent vs. thermodenuded). The left column (A-D) is for nascent soot. The right column (E-H) is for denuded soot. Panels A and E are  $\lambda = 532$  nm NOAA PAS data, panels B and F are  $\lambda = 532$  nm PASS-3 data, panels C and G are  $\lambda = 405$  nm PASS-3 data, and D and H are  $\lambda = 781$  nm PASS-3 data.

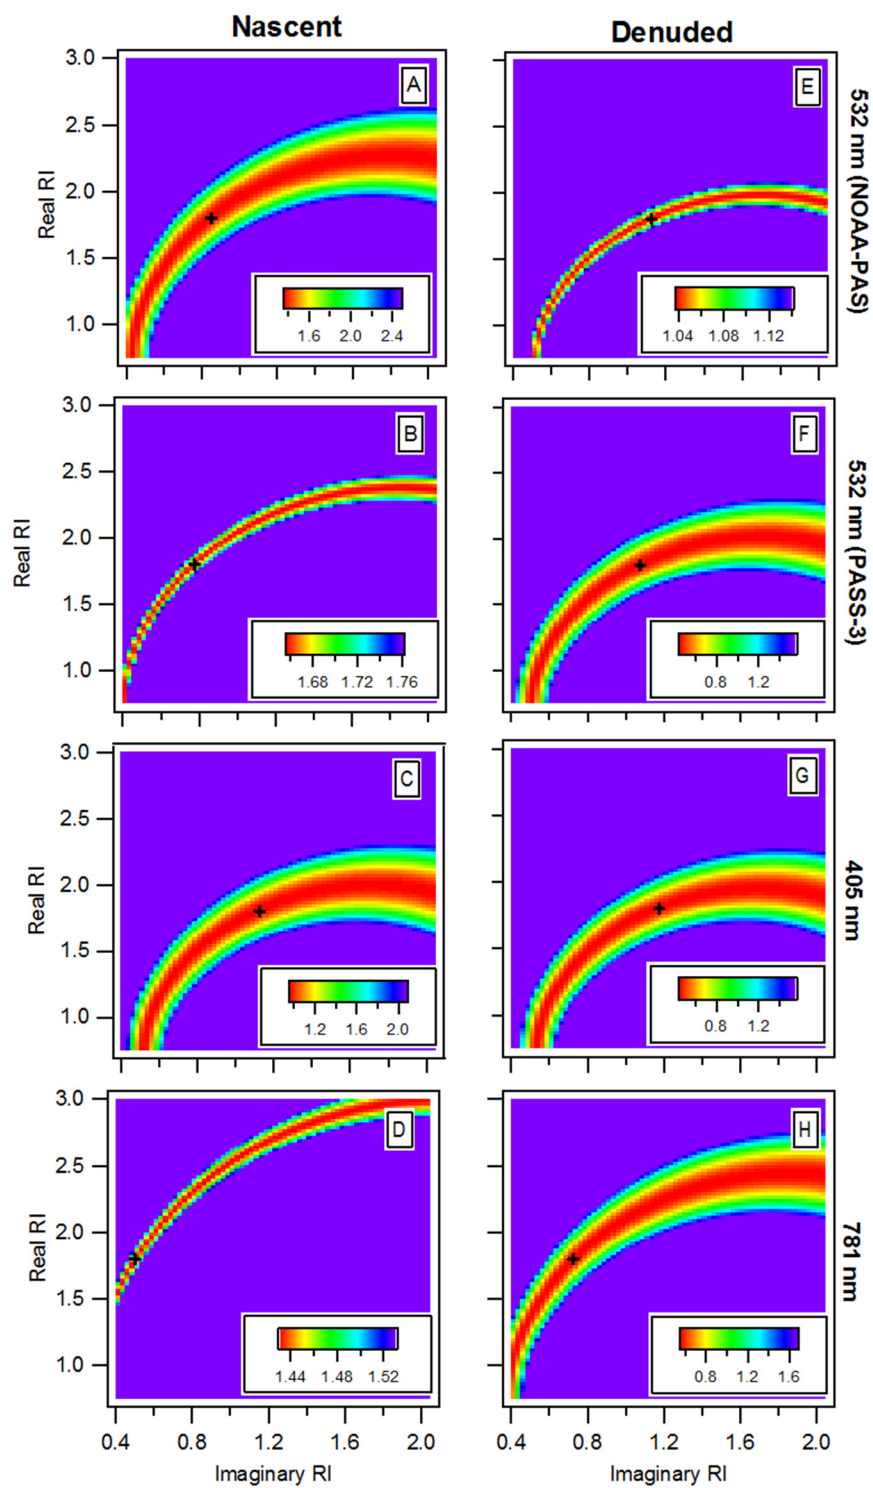

**Figure S7.** Same as Figure S6, except for RDG fits instead of Mie fits. Panel letters correspond to the same datasets as Figure S6.

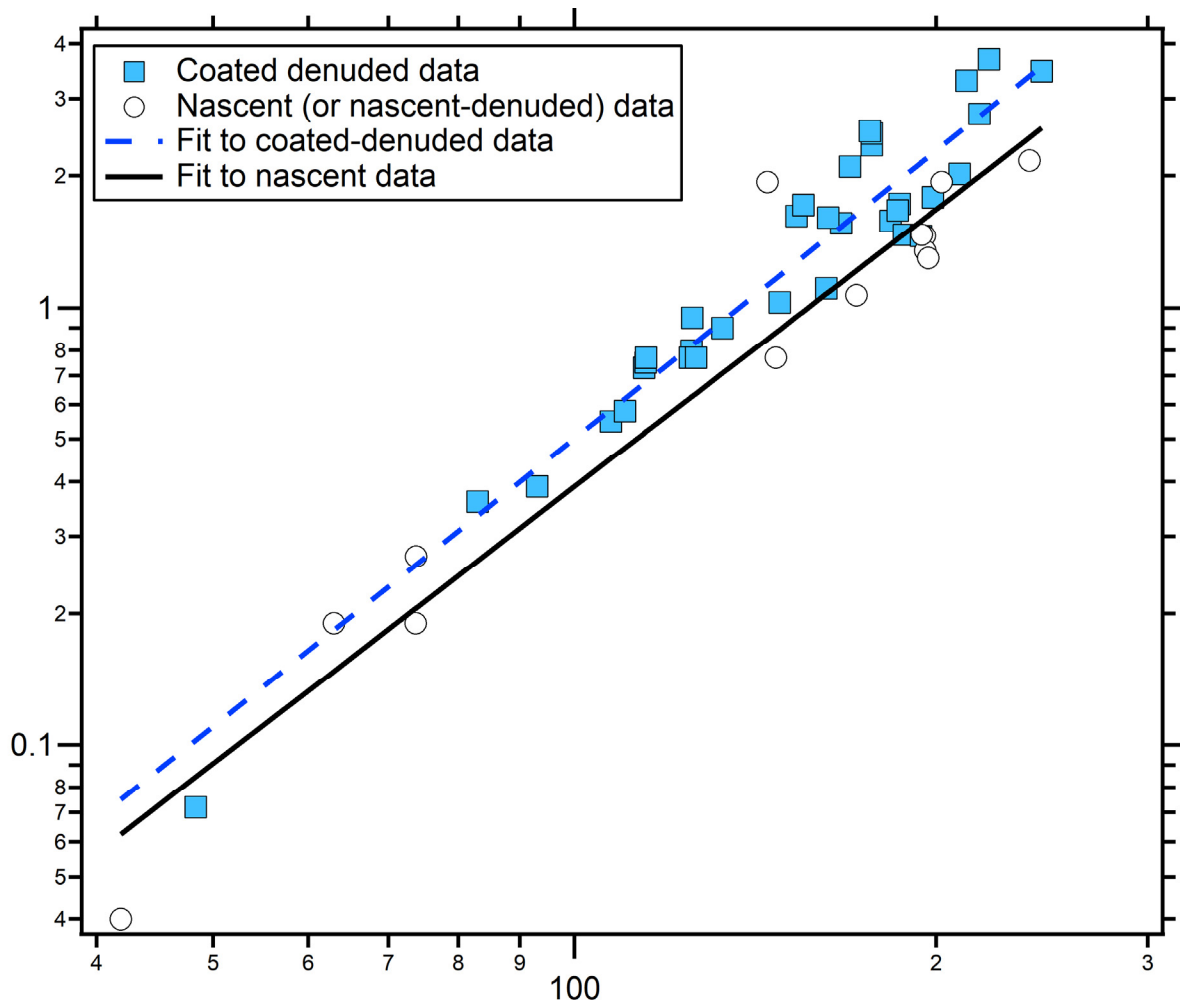

**Figure S8.** Fit of CPMA mass per particle as a function of the SMPS mode number-weighted mobility diameter for soot particles from the premixed ethylene flame from BC2, when the flame was sampled at 20 cm above the burner surface. The blue squares are coated denuded observations and the dashed blue line is the associated power-law fit. The white circles are nascent observations and the black line is the associated power-law fit. The data were fit to a power law function (see eqn. 8 in the main text). For nascent soot, fit parameters  $C$  and  $D_{f,m}$  were  $2.40 \times 10^{-5}$  and 2.12, respectively, and for coated-denuded soot, fit parameters  $C$  and  $D_{f,m}$  were  $1.33 \times 10^{-5}$  and 2.28, respectively.

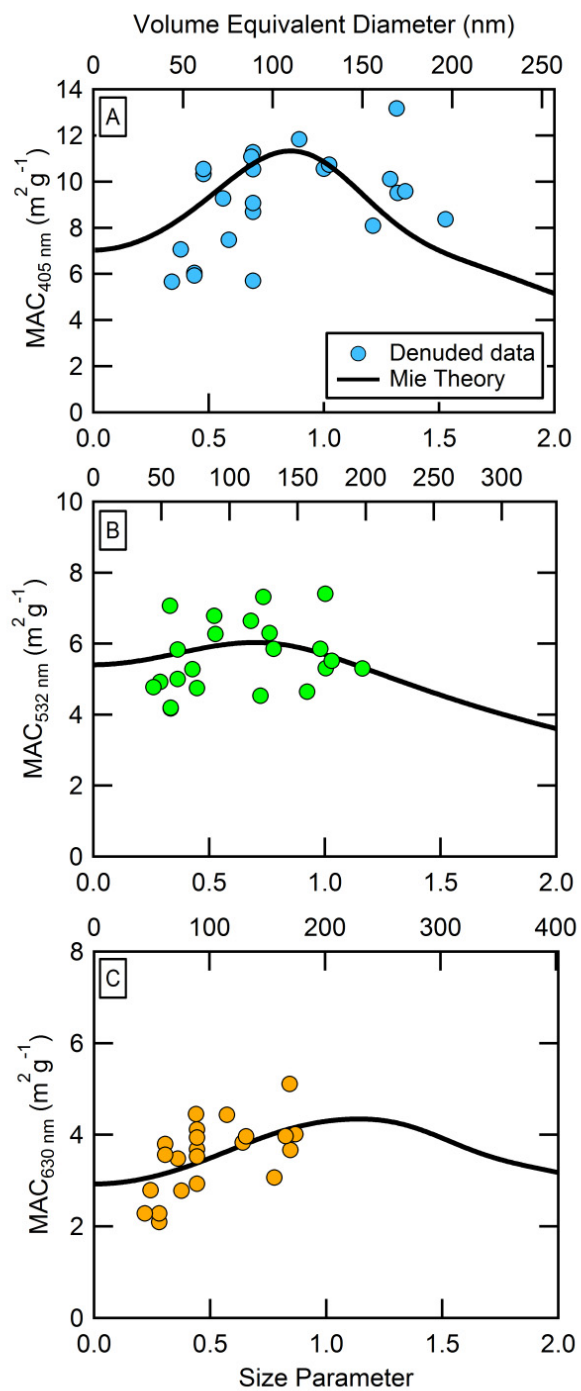

**Figure S9.** MACs for ethylene soot sampled 5.1 cm above the burner surface as a function of size parameter (bottom) and volume equivalent diameter (top) for (A)  $\lambda = 405$  nm, (B)  $\lambda = 532$  nm, and (C)  $\lambda = 630$ .

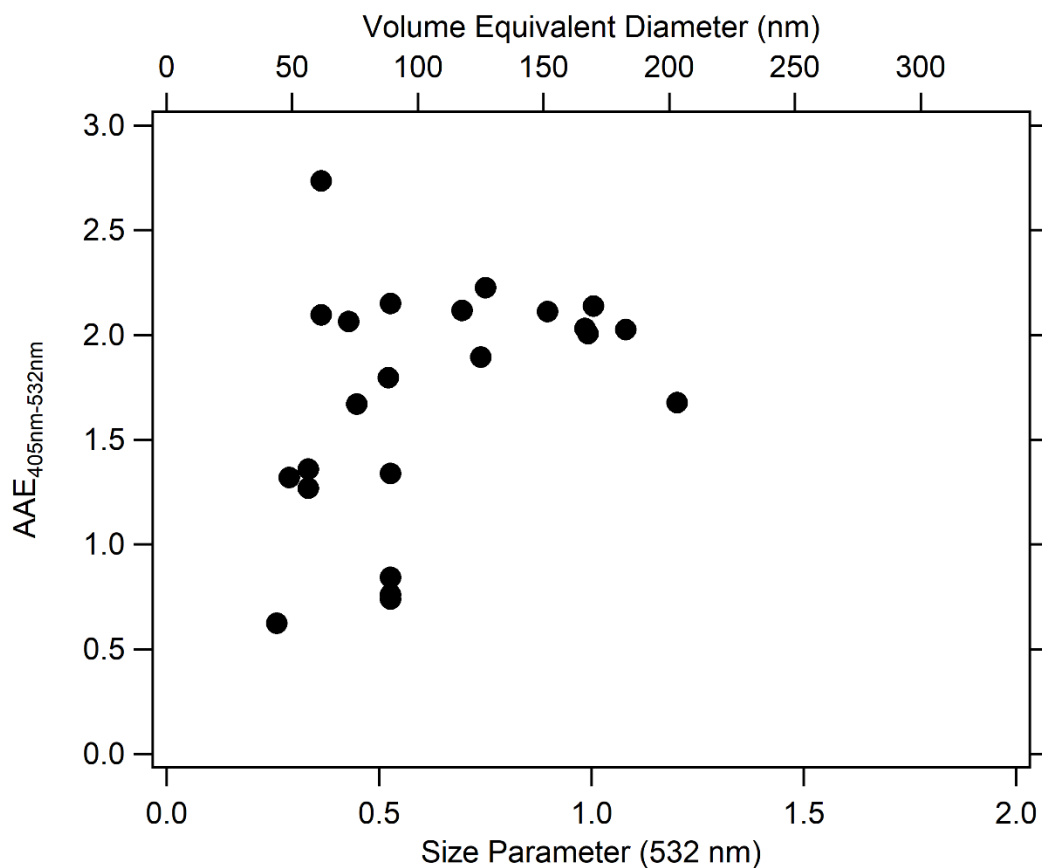

**Figure S10.** Absorption Ångström exponent ( $AAE$ ) calculated using data measured at  $\lambda = 405$  nm and  $\lambda = 532$  nm as a function of size parameter (at  $\lambda = 532$  nm) and volume equivalent diameter produced from the ethylene flame during BC3+.
